# Supplementary material for: Novel stable metal–organic framework photocatalyst for light-driven hydrogen production
Source: Royal Society of Chemistry journal article supplement (doi:10.1039/c8ce00386f), 2018-01-01
Supplement: c8ce00386f1.pdf [file c8ce00386f1.pdf]

# Supplementary Information

## Novel Stable Metal-Organic Framework Photocatalyst for Light-Driven Hydrogen Production

Qi Yu,<sup>†</sup> Hong Dong,<sup>†</sup> Xin Zhang,<sup>†</sup> Ya-Xin Zhu, Jian-Hui Wang, Feng-Ming Zhang\* and Xiao-Jun Sun\*

School of Materials Science and Engineering, College of Chemical and Environmental Engineering, Harbin University of Science and Technology, Harbin, 150040, P. R. China.

<sup>†</sup> Qi Yu, Hong Dong and Xin Zhang contributed equally to this work and should be considered co-first authors.

\*E-mail: zhangfm80@163.com

\*E-mail: sunxiaojun@hrbust.edu.cn

### Contents

|                                                                                                  |    |
|--------------------------------------------------------------------------------------------------|----|
| <b>Materials and Characterization</b> .....                                                      | S2 |
| <b>Figure S1</b>   FT-IR Spectra of Dye-based Dy-MOF.....                                        | S2 |
| <b>Figure S2</b>   TGA of Dye-based Dy-MOF.....                                                  | S3 |
| <b>Figure S3</b>   XRD Datas of Dye-based Dy-MOF.....                                            | S3 |
| <b>Figure S4</b>   SEM Image of Dye-based Dy-MOF.....                                            | S4 |
| <b>Figure S5</b>   N <sub>2</sub> Adsorption and Desorption Isotherms of Dye-based Dy-MOF.....   | S4 |
| <b>Figure S6</b>   Pore Size Distribution of Dye-based Dy-MOF.....                               | S5 |
| <b>Figure S7</b>   The Least Asymmetric Unit of of Dye-based Dy-MOF.....                         | S5 |
| <b>Figure S8</b>   Photocurrent Response Curve of Dye-based Dy-MOF.....                          | S6 |
| <b>Figure S9</b>   Photocatalytic H <sub>2</sub> Generation Rates of Dye-based Dy-MOF.....       | S6 |
| <b>Figure S10</b>   The Photocatalytic H <sub>2</sub> Production Activity Evaluation System..... | S7 |
| <b>Figure S11</b>   The FT-IR Spectra of Dye-based Dy-MOF after Reaction.....                    | S7 |
| <b>Figure S12</b>   The XRD Datas of Dye-based Dy-MOF after Reaction.....                        | S8 |
| <b>Figure S13</b>   The Dye-based Dy-MOF Samples of after Reaction.....                          | S8 |
| <b>Table S1-S2</b>   Crystal Data, Selected Bond Lengths and Angles.....                         | S9 |

## Materials and Characterization

DMF, EtOH were purchased from Tianjing zhiyuan chemical reagent Co.,Ltd. (Tianjing, China)  $\text{Dy}(\text{NO}_3)_3 \cdot 6\text{H}_2\text{O}$  and 5-aminoisophthalic acid were obtained from Aladdin, Jianglai and Aldrich. NaOH,  $\text{Na}_2\text{SO}_4$  was purchased from Hubei Yuancheng Company, (Hubei, China). All solvents and reagents were analytical grade and used without further purification.

Infrared spectrum using the KBr pellet was measured on a Bruker Tensor 27 in the range of  $4000\text{--}400\text{ cm}^{-1}$ . Thermogravimetric (TG) analysis was carried out on a Netzsch STA449F3 analyser at a heating rate of  $10\text{ }^\circ\text{C/min}$  from ambient temperature to  $750\text{ }^\circ\text{C}$ . X-ray powder diffraction (PXRD) patterns were recorded on a DX-2700B X-ray diffractometer. The patterns were collected at a scanning rate of  $5^\circ$  per min in the  $2\theta$  range from  $5\text{--}50^\circ$ . Cyclic voltammograms (CV) were easured with a CHI760D workstation in a conventional three lectrode system with a scanning rate of  $50\text{ mV s}^{-1}$ . A carbon-paste orking electrode, a Pt counter electrode and an Ag/AgCl reference lectrode were used. Measurements were performed in a  $1\text{ M Na}_2\text{SO}_4$  solution. Diffuse eelectance UV-vis spectra was carried out with a Lambda 35 spectrometer.

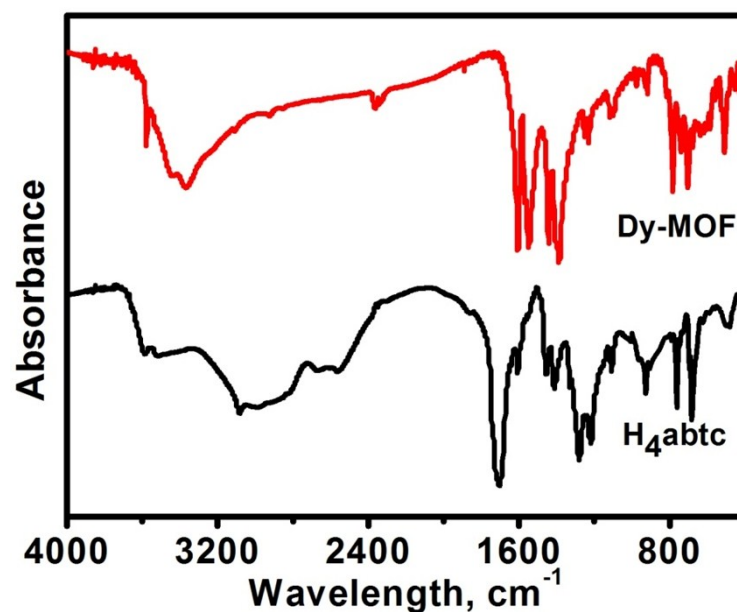

**Figure S1.** FT-IR spectra of dye-based Dy-MOF and H<sub>4</sub>abtc ligand.

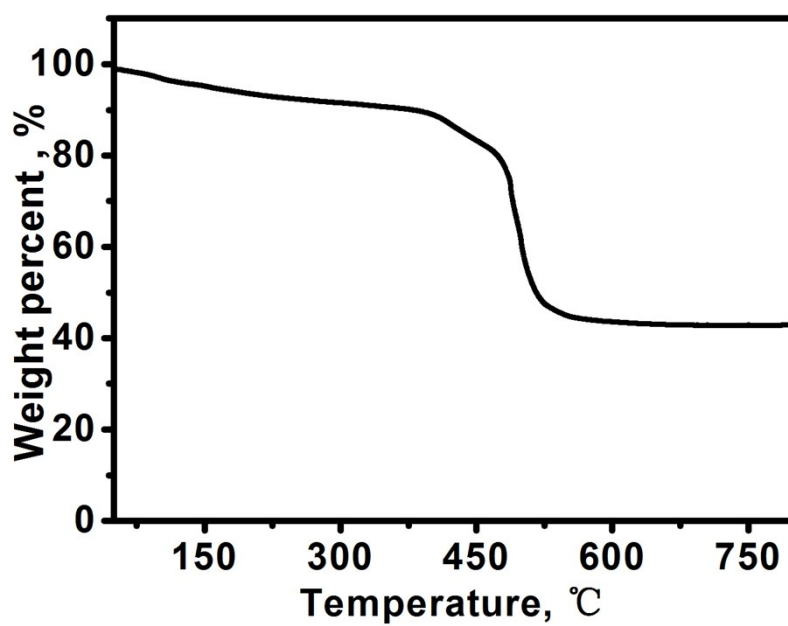

**Figure S2.** TGA curve of dye-based Dy-MOF.

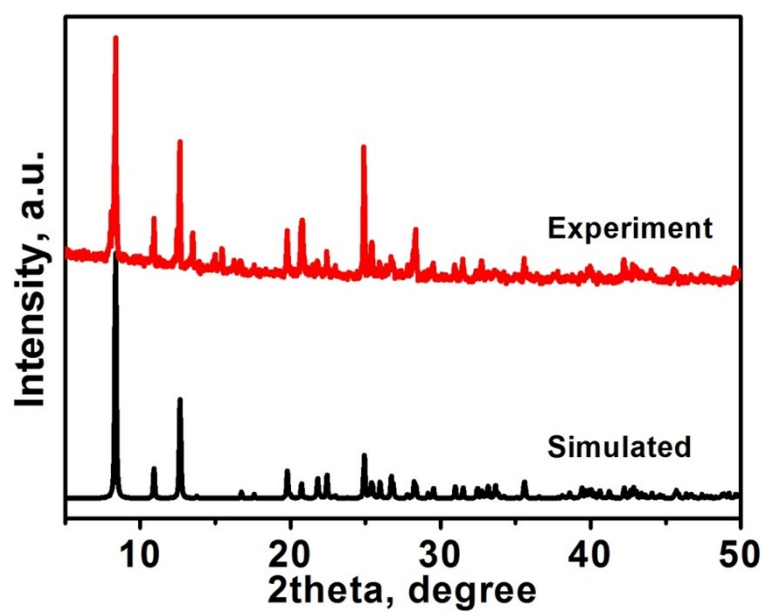

**Figure S3.** XRD datas of dye-based Dy-MOF for the simulated pattern and as-synthesized sample.

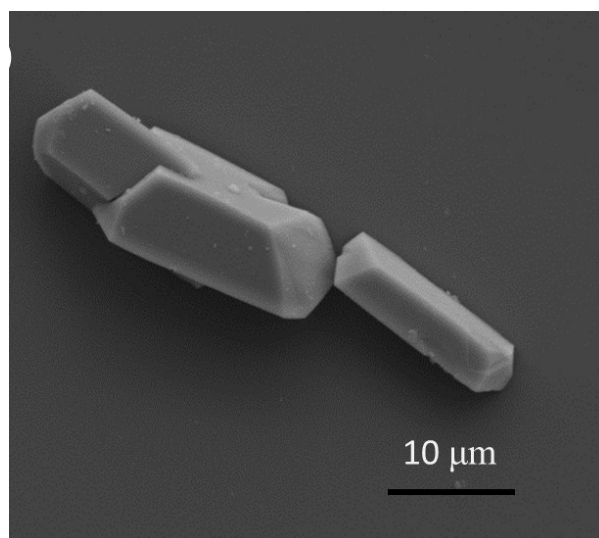

**Figure S4.** SEM image of dye-based Dy-MOF.

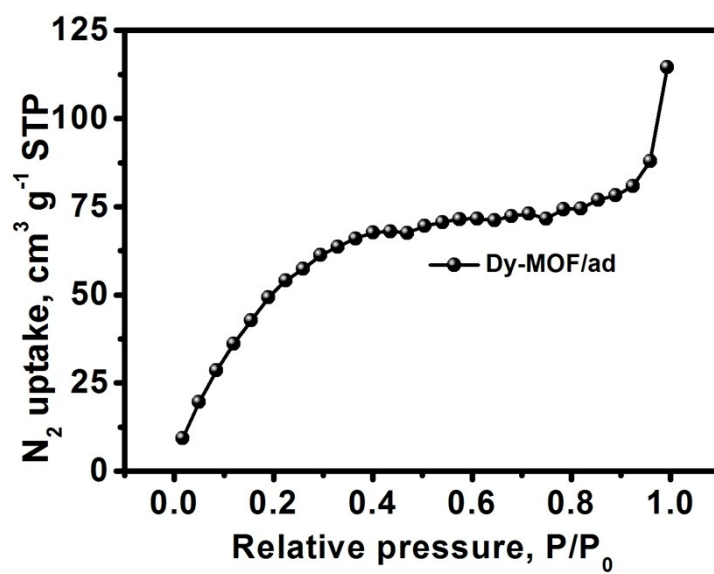

**Figure S5.**  $N_2$  adsorption isotherms of dye-based Dy-MOF.

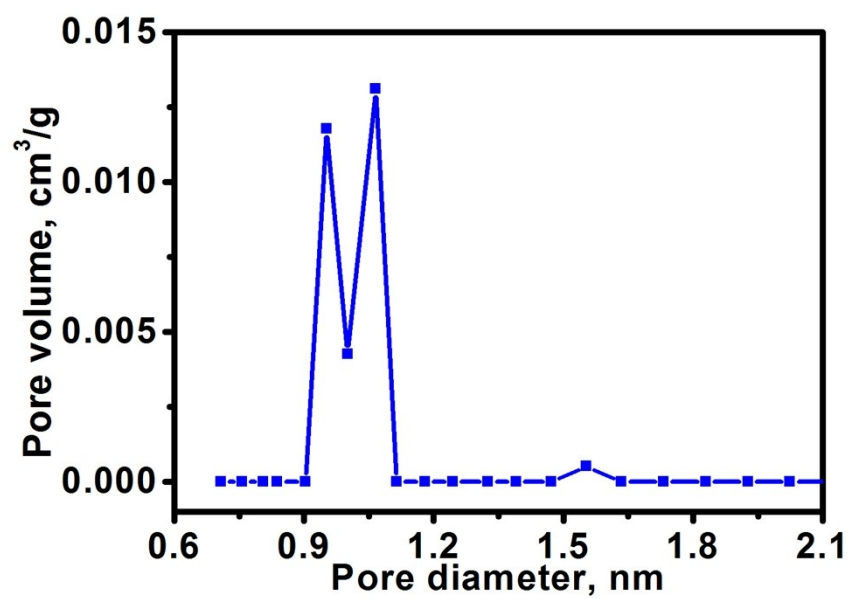

**Figure S6.** Pore size distribution of dye-based Dy-MOF.

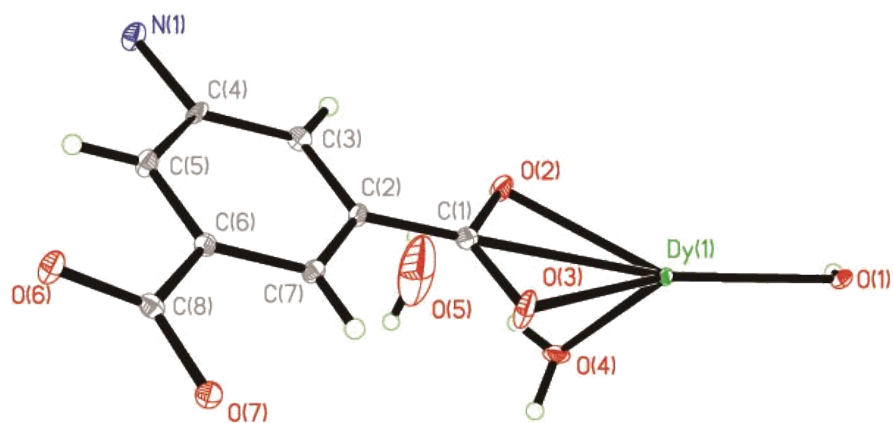

**Figure S7.** The least asymmetric unit of dye-based Dy-MOF.

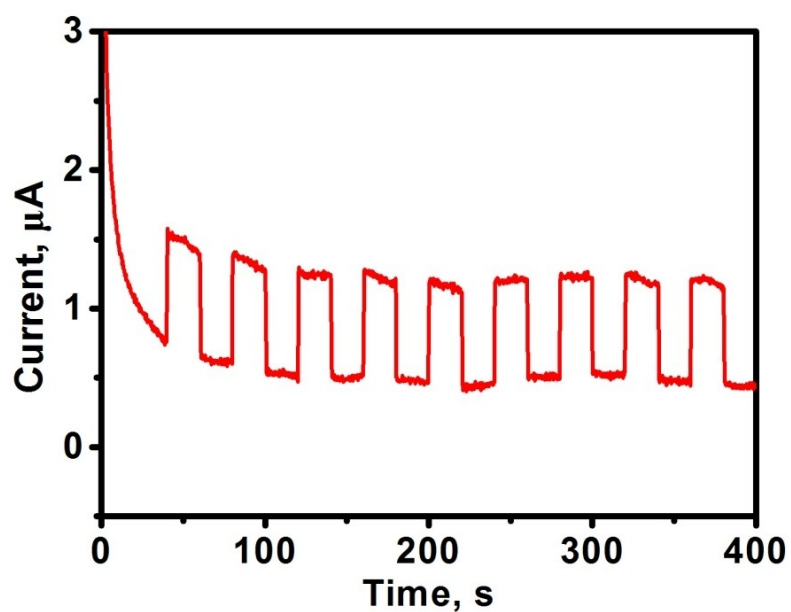

Figure S8. Photocurrent response curve of dye-based Dy-MOF.

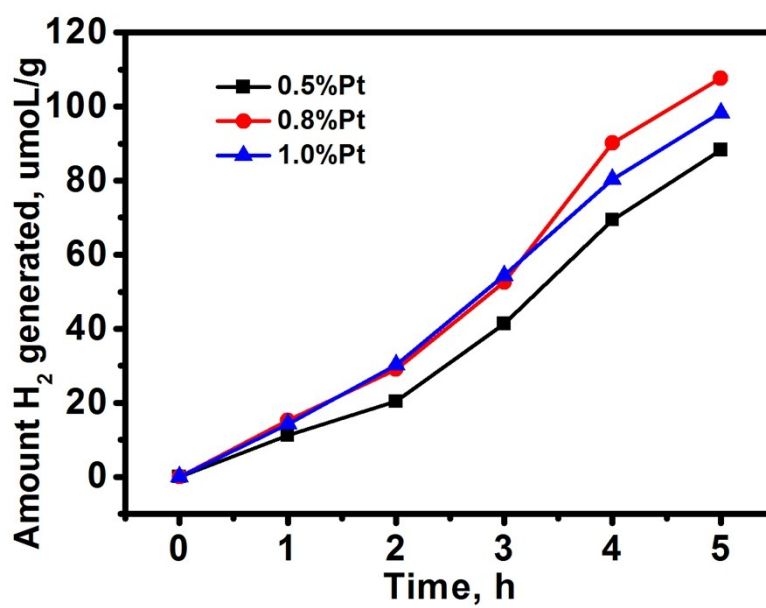

Figure S9. Photocatalytic  $\text{H}_2$  generation rates for dye-based Dy-MOF (0.5, 0.8 and 1.0 wt % Pt).

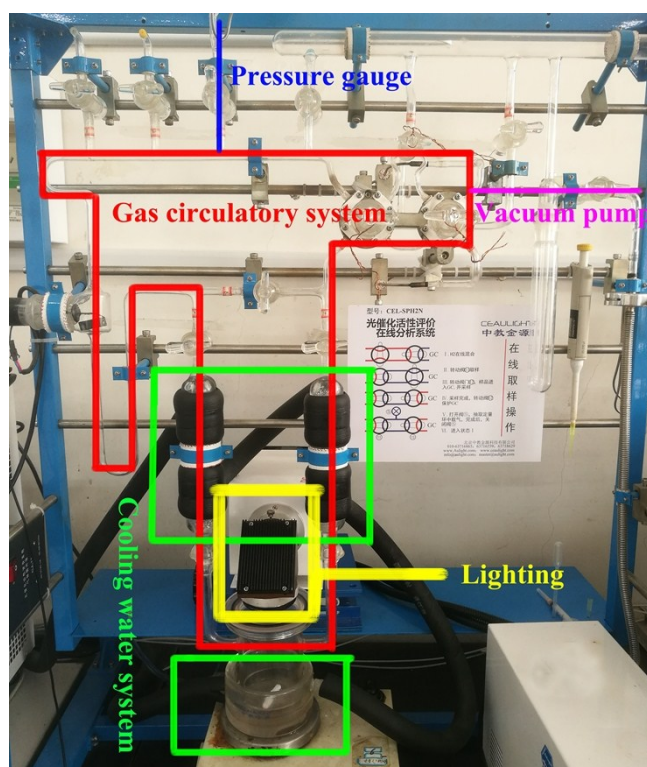

Figure S10. The photocatalytic H<sub>2</sub> production activity evaluation system.

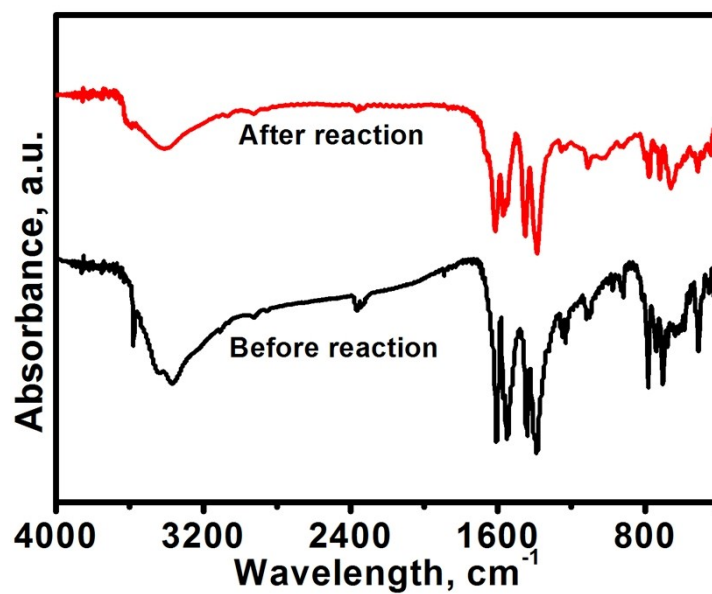

Figure S11. FT-IR spectra of dye-based Dy-MOF after and before reaction.

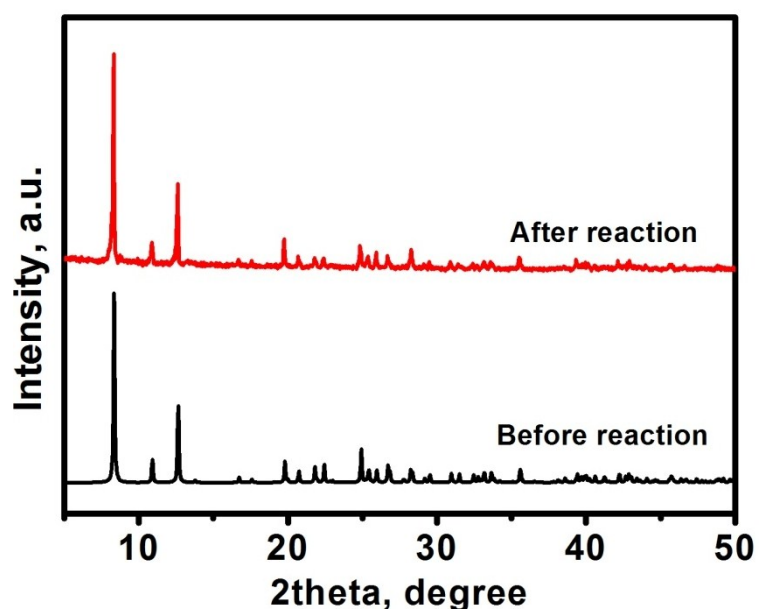

**Figure S12.** The XRD datas of dye-based Dy-MOF after and before reaction.

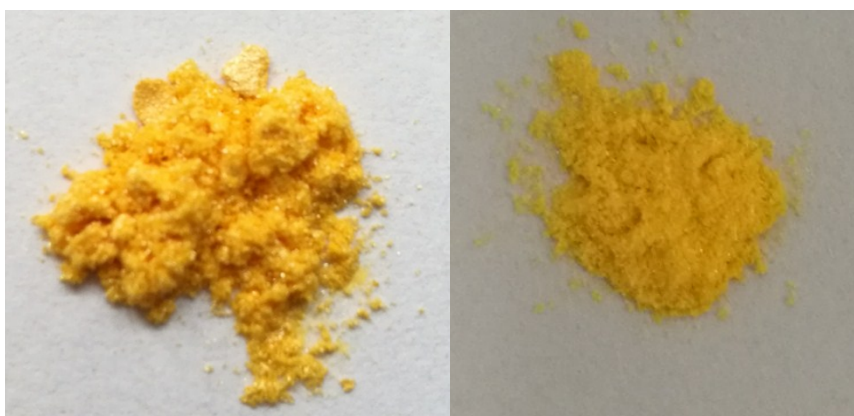

**Figure S13.** The dye-based Dy-MOF samples of after reaction and before reaction.



**Table S1.** Crystal data and structure refinement for dye-based Dy–MOF

| Compound                                                                                                                                                                 | Dy–MOF                                          |
|--------------------------------------------------------------------------------------------------------------------------------------------------------------------------|-------------------------------------------------|
| formula                                                                                                                                                                  | C <sub>8</sub> H <sub>9</sub> O <sub>7</sub> Dy |
| fw                                                                                                                                                                       | 390.08                                          |
| crystal system                                                                                                                                                           | Monoclinic                                      |
| space group                                                                                                                                                              | P 21/n                                          |
| <i>a</i> (Å)                                                                                                                                                             | 4.55760(10)                                     |
| <i>b</i> (Å)                                                                                                                                                             | 16.2048(4)                                      |
| <i>c</i> (Å)                                                                                                                                                             | 14.0456(3)                                      |
| $\alpha$ (deg)                                                                                                                                                           | 90                                              |
| $\beta$ (deg)                                                                                                                                                            | 95.241(2)                                       |
| $\gamma$ (deg)                                                                                                                                                           | 90                                              |
| <i>V</i> (Å <sup>3</sup> )                                                                                                                                               | 1033.00(4)                                      |
| <i>Z</i>                                                                                                                                                                 | 4                                               |
| <i>D</i> <sub>calcd</sub> (g cm <sup>−3</sup> )                                                                                                                          | 2.508                                           |
| <i>R</i> (int)                                                                                                                                                           | 293(2)                                          |
| $\mu$ (mm <sup>−1</sup> )                                                                                                                                                | 6.871                                           |
| <i>F</i> (000)                                                                                                                                                           | 740                                             |
| <i>R</i> <sub>1</sub> [ <i>I</i> > 2σ( <i>I</i> )] <sup>a</sup>                                                                                                          | 0.0213                                          |
| <i>wR</i> <sub>2</sub> [ <i>I</i> > 2σ( <i>I</i> )] <sup>b</sup>                                                                                                         | 0.0436                                          |
| <i>R</i> <sub>1</sub> (all data)                                                                                                                                         | 0.0276                                          |
| <i>wR</i> <sub>2</sub> (all data)                                                                                                                                        | 0.0456                                          |
| GOF on <i>F</i> <sup>2</sup>                                                                                                                                             | 1.034                                           |
| <sup>a</sup> <i>R</i> <sub>1</sub> = $\sum   F_o  -  F_c   / \sum  F_o $ . <sup>b</sup> <i>wR</i> <sub>2</sub> = $[\sum w (F_o^2 - F_c^2)^2 / \sum w (F_o^2)^2]^{1/2}$ . |                                                 |

**Table S2.** Selected bond lengths (Å) and angles (deg) for dye-based Dy–MOF

|                     |            |                      |            |
|---------------------|------------|----------------------|------------|
| Dy(1)-O(3)#6        | 2.301(3)   | Dy(1)-O(4)#7         | 2.364(3)   |
| Dy(1)-O(6)#4        | 2.393(3)   | Dy(1)-O(6)#5         | 2.403(3)   |
| Dy(1)#4-O(6)-Dy(1)  | 104.01(10) | Dy(1)#4-O(6)-Dy(1)#5 | 143.70(13) |
| Dy(1)-O(6)-Dy(1)#5  | 100.42(10) | O(3)#6-Dy(1)-O(5)    | 73.18(10)  |
| O(3)#6-Dy(1)-O(4)#7 | 143.32(9)  | O(5)-Dy(1)-O(4)#7    | 141.20(10) |
| O(3)#6-Dy(1)-O(6)#4 | 120.11(10) | O(5)-Dy(1)-O(6)#4    | 76.27(10)  |
| O(4)#7-Dy(1)-O(6)#4 | 72.14(10)  | O(3)#6-Dy(1)-O(6)    | 74.93(9)   |
| O(5)-Dy(1)-O(6)     | 117.92(10) | O(4)#7-Dy(1)-O(6)    | 75.45(9)   |
| O(6)#4-Dy(1)-O(6)   | 75.99(10)  | O(3)#6-Dy(1)-O(6)#5  | 77.79(10)  |
| O(5)-Dy(1)-O(6)#5   | 139.65(10) | O(4)#7-Dy(1)-O(6)#5  | 76.01(9)   |
| O(6)#4-Dy(1)-O(6)#5 | 143.70(13) | O(6)-Dy(1)-O(6)#5    | 79.58(10)  |
| O(3)#6-Dy(1)-O(1)   | 135.52(10) | O(5)-Dy(1)-O(1)      | 83.03(11)  |
| O(4)#7-Dy(1)-O(2)   | 114.76(10) | O(6)#4-Dy(1)-O(2)    | 132.27(10) |
| O(6)-Dy(1)-O(2)     | 151.19(9)  | O(6)#5-Dy(1)-O(2)    | 77.31(10)  |
| O(1)-Dy(1)-O(2)     | 53.21(9)   |                      |            |

Symmetry transformations used to generate equivalent atoms: #1 = − *y* + 1/3, − *x* + 2/3, *z* + 1/6; #2 = *y*, − *x* + *y*, − *z*; #3 = − *x* + *y* + 1/3, *y* − 1/3, *z* + 1/6; #4 = *y* + 1/3, *x* − 1/3, − *z* + 1/6; #5 = − *x* + 1, − *y*, − *z*; #6 = − *y* + 2/3, − *x* + 1/3, *z* − 1/6; #7 = *x* − *y*, *x*, − *z*; #8 = − *x* + *y* + 2/3,

y

+

1/3,
